# Supplementary material for: Determination of Radiotherapy Efficiency in Non-Small Cell Lung Cancer Patients by Vibration Spectroscopy Methods
Source: Research Square preprint supplement (doi:10.21203/rs.3.rs-6194975/v1), 2025-04-17
Supplement: Supplementary file 1 [file e525e3f73d035c5f45563218.docx]

**HIGHLIGTS**

1- While treatment in radiotherapy is ongoing, it is very important to determine the treatment regimen or to know whether it is determined correctly.

2- Our study will also guide the determination of treatment effectiveness in similar cancer patients.

3- No similar study was found in the literature review. Therefore, the patent process for this study has also been initiated.
